# Supplementary material for: Synaptic and Cytoskeletal CSF Signatures of Motor Neuron Disease: The Role of Cyclase-Associated Protein 2
Source: Research Square preprint supplement (doi:10.21203/rs.3.rs-7933370/v1), 2025-11-14
Supplement: Supplementary file 1 [file a11ddb18e9284ba2829b37d2.docx]

**Supplementary Table 1.** Demographics, clinical and CSF biomarkers for MND associated with prominent involvement of primary and secondary motoneuron (UMN and LMN, respectively). Continuous variables are reported as median (interquartile range), and categorical variables are reported as numbers and percentages (n, %).

|  | **MND -UMN (n=45)** | **MND-LMN (n=15)** | **p-value** |
| --- | --- | --- | --- |
| **Age** | 60.79 (17.67) | 58.60 (26.32) | 0.587 a |
| **Sex (F:M)** | 20:25 | 4:11 | 0.547 d |
| **Disease Duration** | 0.643 (1.15) | 1.00 (1.73) | 0.814 a |
| **CSF biomarkers** | | | |
| **GFAP [pg/mL]** | 12475.84 (5701.70) | 11164.40 (9228.20) | 0.624 b |
| **NfL [pg/mL]** | 5202.61 (1070.45) | 2602.42 (2184.65) | 0.004 a |
| **p-tau 181 [pg/mL]** | 41.01 (24.50) | 47.82 (26.18) | 0.217 a |
| **t-tau [pg/mL]** | 322.05 (181.62) | 368.80 (229.22) | 0.421 a |
| **CAP2 [pg/mL]** | 37.17 (8.71) | 35.82 (10.54) | 0.642 c |
| **SNAP-25 [pg/mL]** | 55.40 (26.70) | 67.35 (28.63) | 0.185 b |
| Note: a Mann-Whitney U test, b Welch test, c Student’s t test, d  2 Chi-squared test. | | | |

**Abbreviations:** HC, healthy controls; MND, motor neuron disease; GFAP, glial fibrillary acidic protein; LMN, lower motor neuron; NfL, neurofilament light chain; p-Tau 181, phosphorylated Tau 181; t-Tau, total Tau; CAP2, cyclase-associated protein 2; SNAP-25, synaptosomal-associated protein 25; UMN upper motor neuron.
